# Supplementary material for: An ultra-dense NiS2/reduced graphene oxide composite cathode for high-volumetric/gravimetric energy density nickel–zinc batteries
Source: Royal Society of Chemistry journal article supplement (doi:10.1039/c9ta04900b), 2019-01-01
Supplement: c9ta04900b2.pdf [file c9ta04900b2.pdf]

Electronic Supplementary Material (ESI) for Chemical Science.  
This journal is © The Royal Society of Chemistry 2019

## Supporting Information

### Ultra-Dense NiS<sub>2</sub>/Reduced Graphene Oxide Composite Cathode for High-Volumetric/Gravimetric Energy Density Nickel-Zinc Batteries

Wenhui Shi,<sup>‡ab</sup> Jing Mao,<sup>‡a</sup> Xilian Xu,<sup>a</sup> Wenxian Liu,<sup>a</sup> Lin Zhang,<sup>a</sup> Xiehong Cao<sup>\*a</sup> and Xihong Lu<sup>c</sup>

*a College of Materials Science and Engineering, Zhejiang University of Technology, 18 Chaowang Road,  
Hangzhou, Zhejiang, 310014, P. R. China*

*b Center for Membrane Separation and Water Science & Technology, Ocean College, Zhejiang University of  
Technology, 18 Chaowang Road, Hangzhou, Zhejiang, 310014, P. R. China*

*c MOE of the Key Laboratory of Bioinorganic and Synthetic Chemistry, KLGHEI of Environment and Energy  
Chemistry, School of Chemistry, Sun Yat-Sen University, Guangzhou, 510275, P.R. China*

*Email: [gcscaoxh@zjut.edu.cn](mailto:gcscaoxh@zjut.edu.cn)*

*Tel: +86-761-88320394, Fax: +86-761-88320394*

### Measurement of tap density for electrode:

The tap density ( $\rho$ ) of the electrodes was calculated by the following equation:

$$\rho = m / (S \times h) \quad (1)$$

where  $m$  is mass of the electrode containing active material, electrical additives and binders,  $S$  and  $h$  are area and thickness of the active material on the electrode, respectively.

### Calculations of capacity, energy and power densities:

Specific capacity ( $C_s$ , mAh g<sup>-1</sup>) and volumetric capacity ( $C_v$ , mAh cm<sup>-3</sup>) of the fabricated cathode material are calculated based on discharging curves using the following equations (1-2):

$$C_s = \frac{\int_0^t I dt}{m} \quad (1)$$

$$C_v = \frac{\int_0^t I dt}{V} \quad (2)$$

where  $I$  is the discharging current (mA),  $t$  is the discharging time (h), and  $m$  (g) is the mass of active material in cathode,  $V$  is the volume of the whole cathode material containing active material and additives.

The gravimetric energy density ( $E_s$ , Wh kg<sup>-1</sup>) and power density ( $P_s$ , W kg<sup>-1</sup>) are calculated by using the following equations (3-4):

$$E_s = \int_0^t \frac{\Delta V \times I}{m} dt \quad (3)$$

$$P_s = \frac{E_s}{\Delta t} \quad (4)$$

where  $\Delta V$  is the discharging voltage range (V),  $I$  is the discharging current (mA),  $t$  is the discharging time (h), and  $m$  is the active mass of HD-NiS<sub>2</sub>/rGO-5 cathode (g).

The volumetric energy density ( $E_{V-cell}$ , mWh cm<sup>-3</sup>) and power density ( $P_{V-cell}$ , mW cm<sup>-3</sup>) of the assembled Ni-Zn battery are calculated using the following equations (5-6):

$$E_{V-cell} = \int_0^t \frac{\Delta V \times I}{V-cell} dt \quad (5)$$

$$P_{V-cell} = \frac{E_{V-cell}}{t} \quad (6)$$

where  $\Delta V$  is the discharging voltage range (V),  $I$  is the discharging current (mA),  $t$  is the discharging time (h),  $V-cell$  is the volume of the whole HD-NiS<sub>2</sub>/rGO-5//Zn battery, including active materials, current collector, separator and Zn plate.

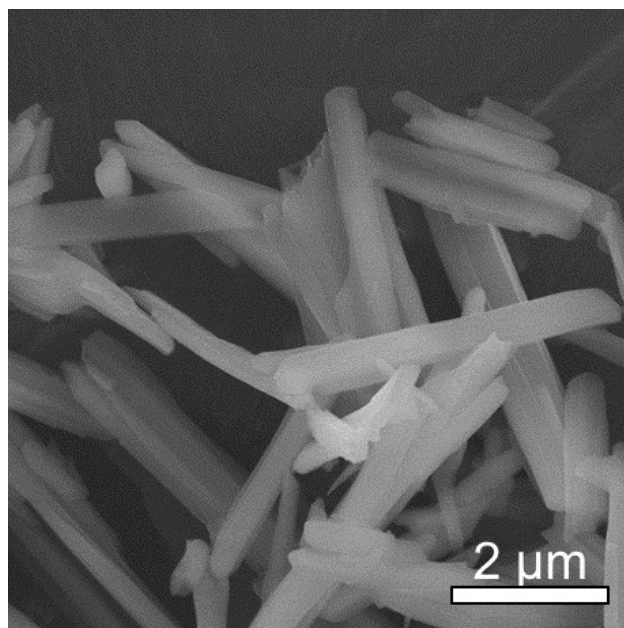

**Figure S1.** SEM image of Ni-MOF crystals.

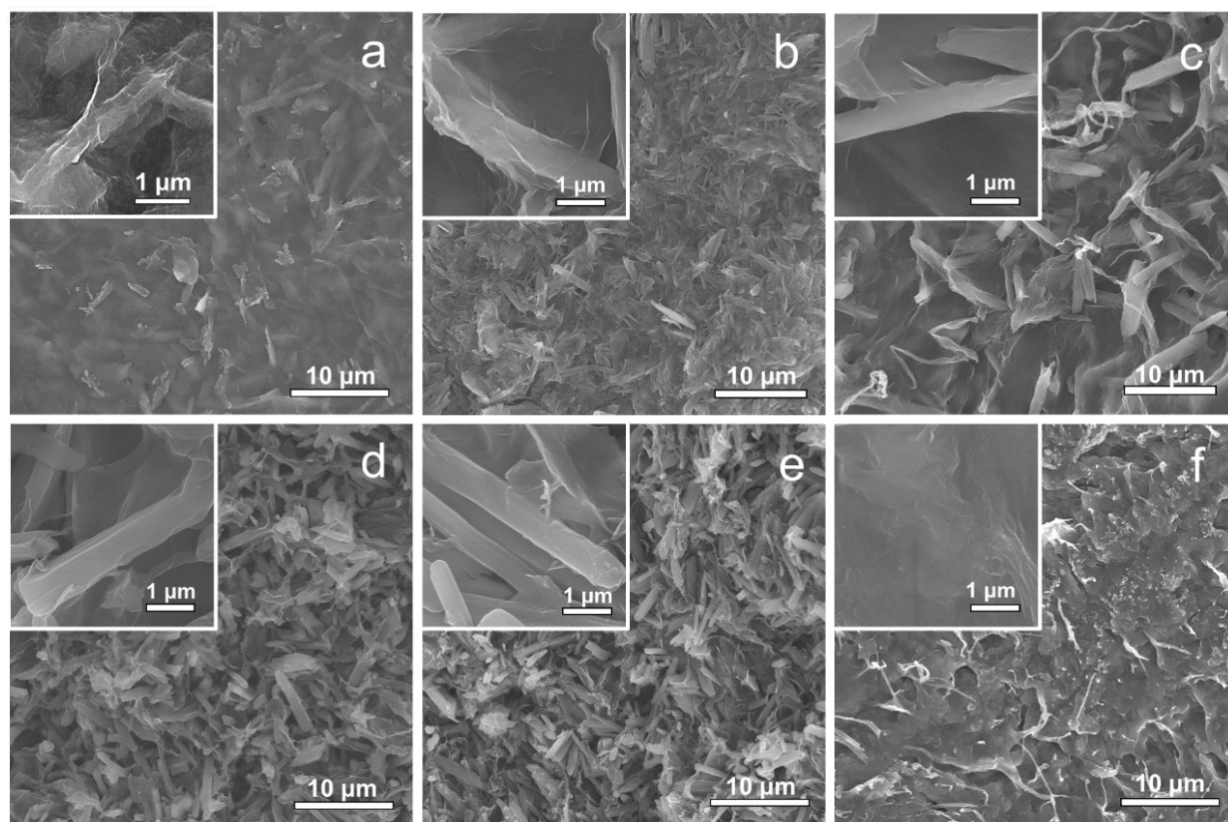

**Figure S2.** SEM images of HD-MOF/GO-*n* with various MOF to GO weight ratios (*n*) of (a) 1 : 1, (b) 3 : 1, (c) 5 : 1, (d) 7.5 : 1, and (e) 10 : 1. (f) SEM image of HD-GO.

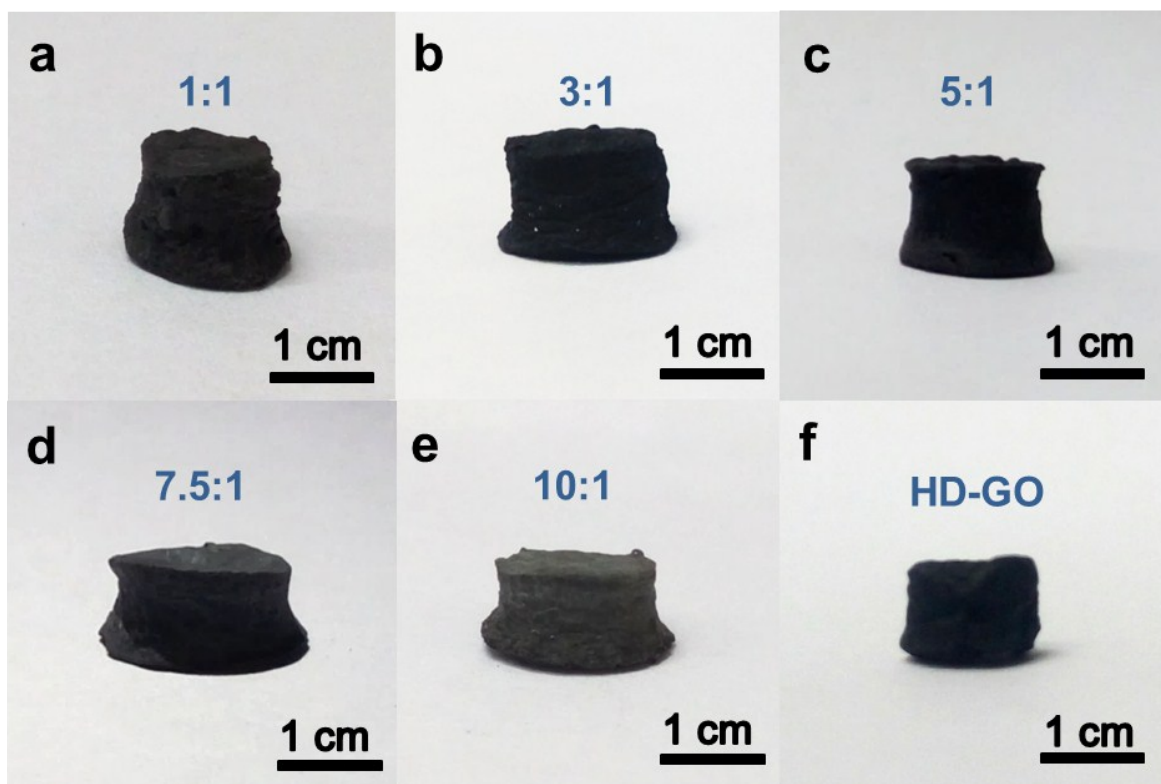

**Figure S3.** Photographs of (a-e) HD-MOF/GO-n with various MOF to GO weight ratios, and (f) HD-GO.

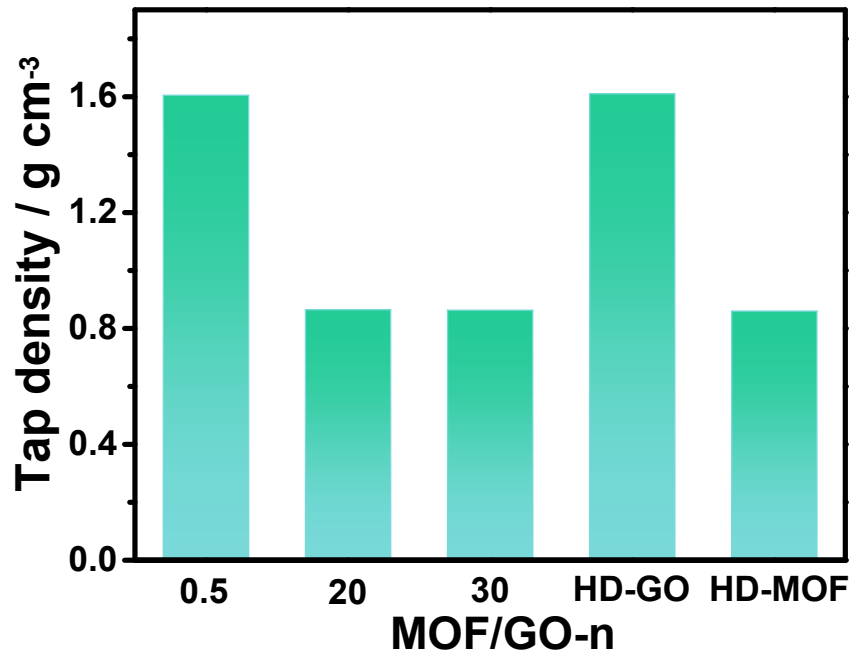

**Figure S4.** Tap densities of HD-MOF/GO-*n* (*n* indicates the weight ratio of MOF to GO), HD-GO and HD-MOF.

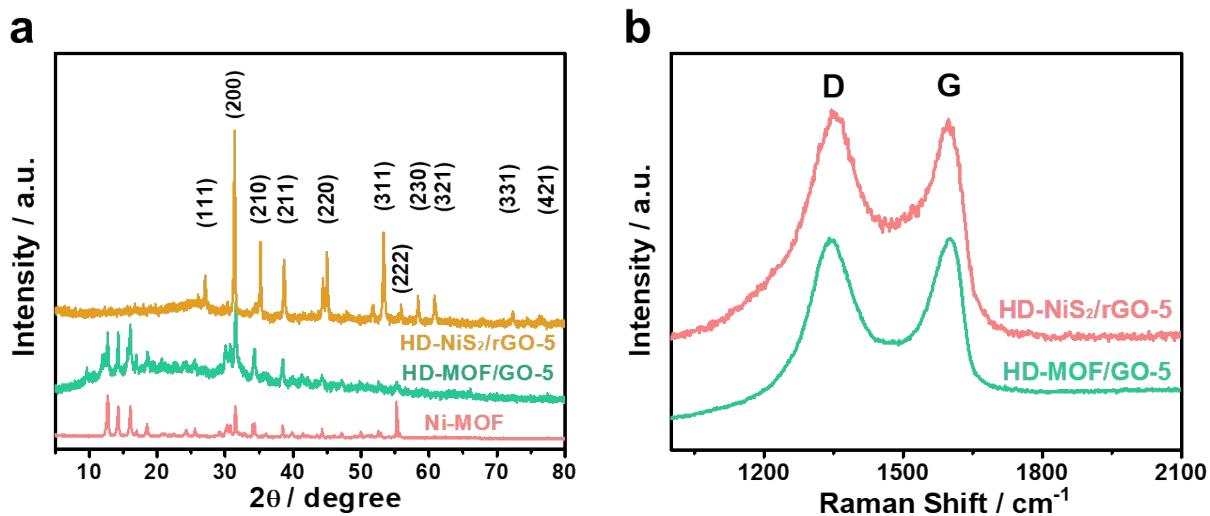

**Figure S5.** (a) XRD patterns of Ni-MOF crystals, HD-MOF/GO-5 and HD-NiS<sub>2</sub>/rGO-5. (b) Raman spectra of HD-MOF/GO-5 and HD-NiS<sub>2</sub>/rGO-5. The intensity ratios of D to G band in HD-MOF/GO-5 and HD-NiS<sub>2</sub>/rGO-5 are 1.0 and 1.03.

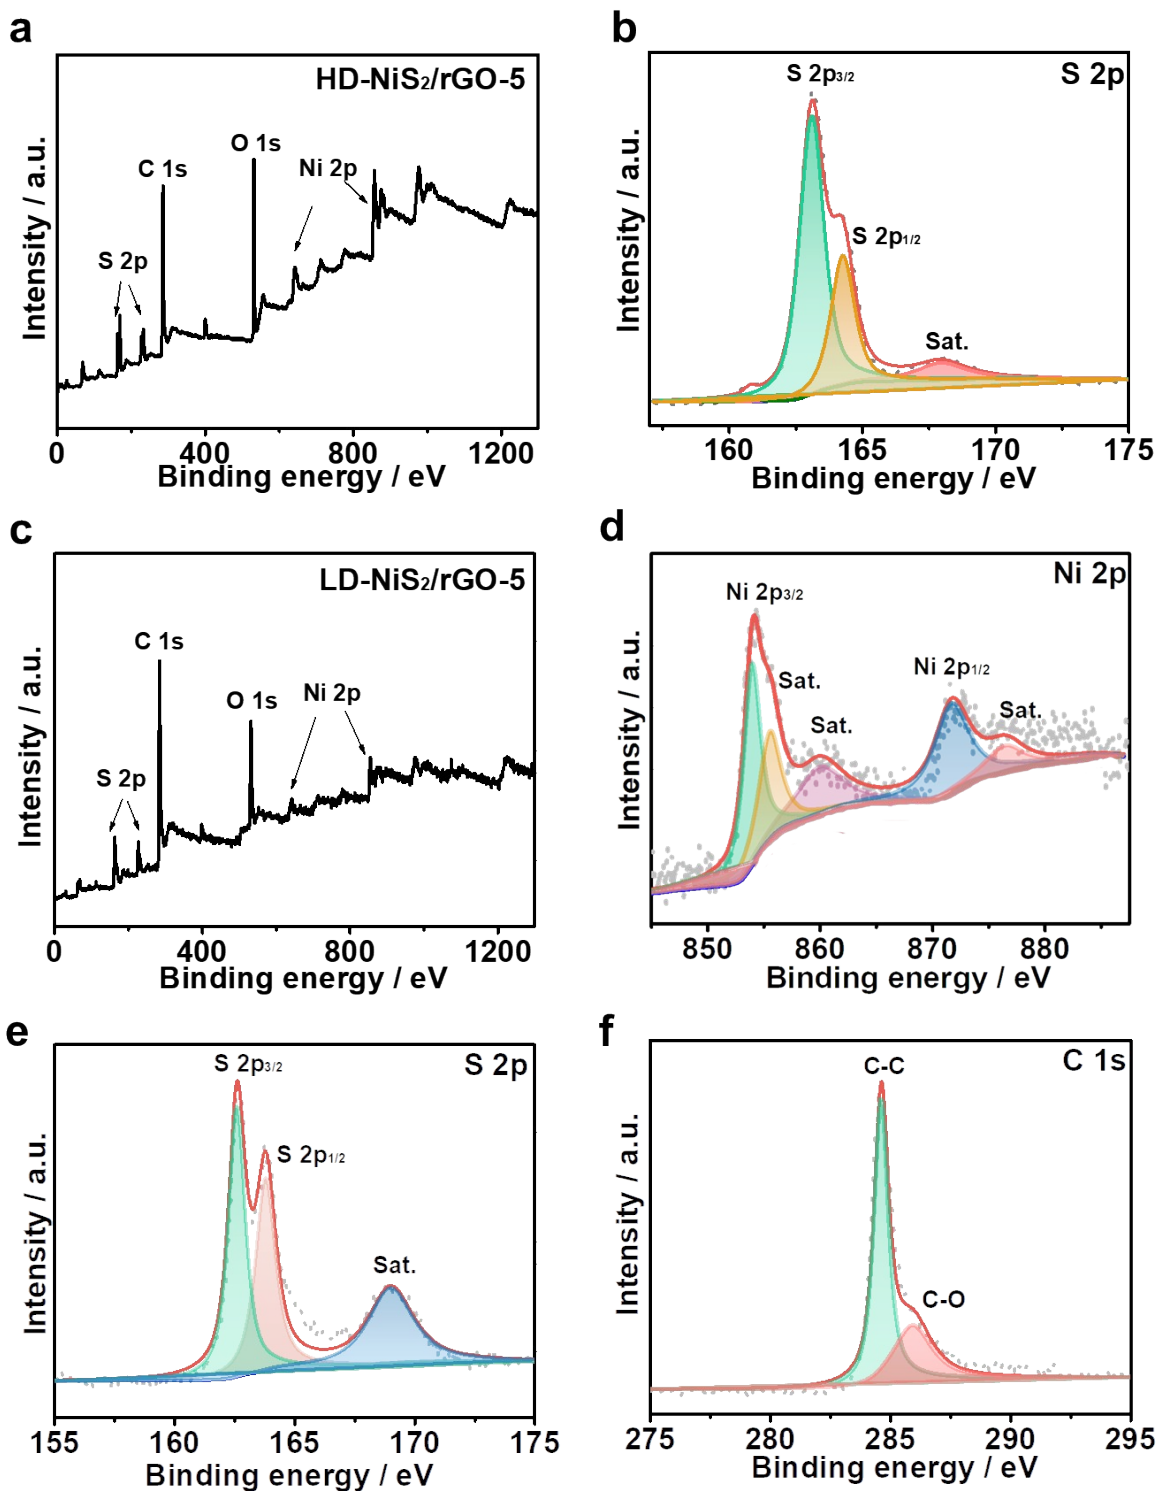

**Figure S6.** (a-b) XPS survey scan spectrum and high-resolution spectrum of S 2p of the HD-NiS<sub>2</sub>/rGO-5. (c-f) XPS survey scan of the LD-NiS<sub>2</sub>/rGO-5 and corresponding high-resolution spectra of Ni 2p, S 2p and C 1s.

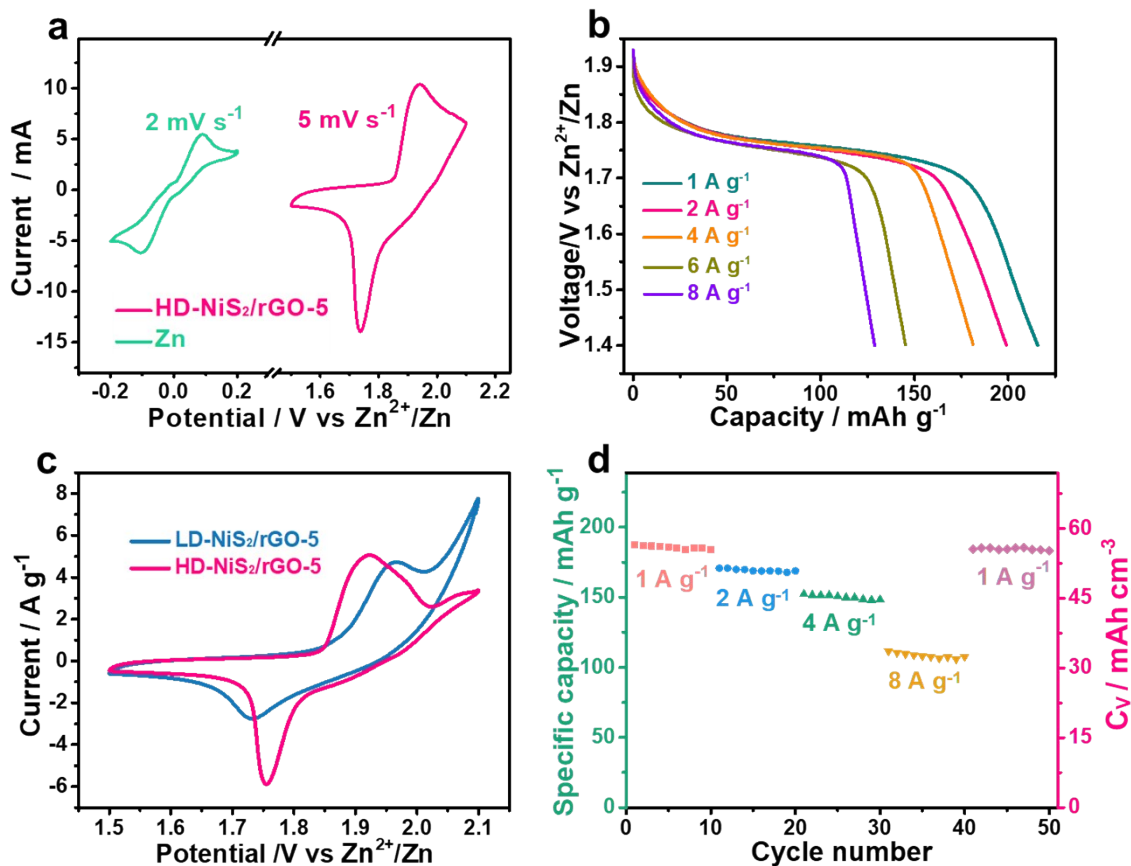

**Figure S7.** Electrochemical performance of HD-NiS<sub>2</sub>/rGO-5//Zn battery, where Zn plate was used as both counter and reference electrode in 1 M KOH and 20 mM Zn(CH<sub>3</sub>COO)<sub>2</sub>. (a) CV curves of the Zn plate, and HD-NiS<sub>2</sub>/rGO-5 electrode. (b) Discharging curves of HD-NiS<sub>2</sub>/rGO-5//Zn battery at different current densities. (c) CV curves of LD- and HD-NiS<sub>2</sub>/rGO-5//Zn battery at a scan rate of 5 mV s<sup>-1</sup>. (d) Rate performance of the LD-NiS<sub>2</sub>/rGO-5//Zn battery.



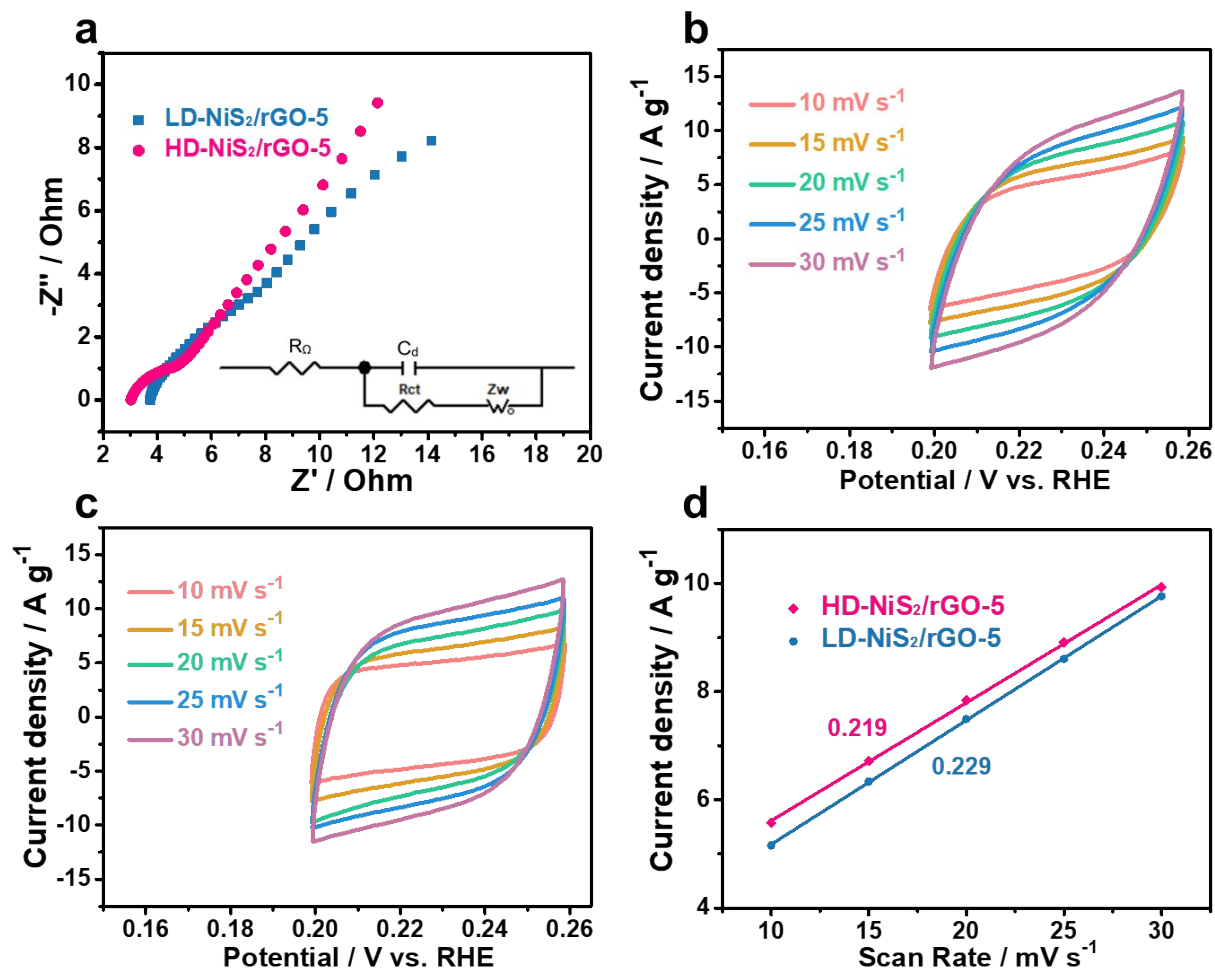

**Figure S8.** (a) Nyquist plots of LD- and HD-NiS<sub>2</sub>/rGO-5//Zn battery. CV curves of (b) HD-NiS<sub>2</sub>/rGO-5 and (c) LD-NiS<sub>2</sub>/rGO-5. (d) The plots of current densities against various scan rates at 0.23 V.

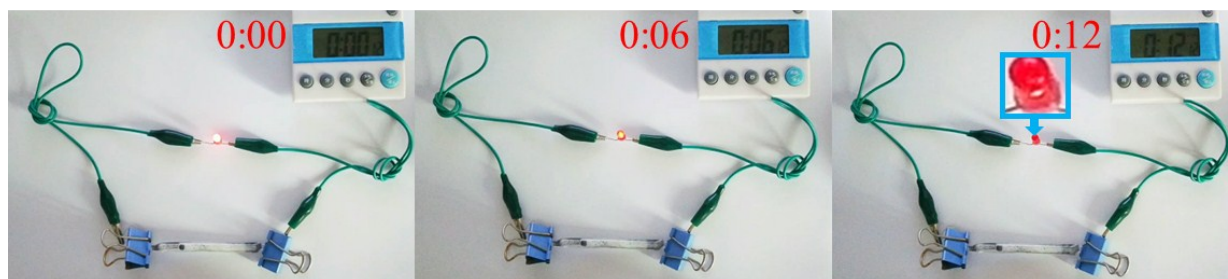

**Figure S9.** Photographs of a LED powered by the HD-NiS<sub>2</sub>/rGO-5//Zn battery, which can keep lighting on for over 12 minutes.

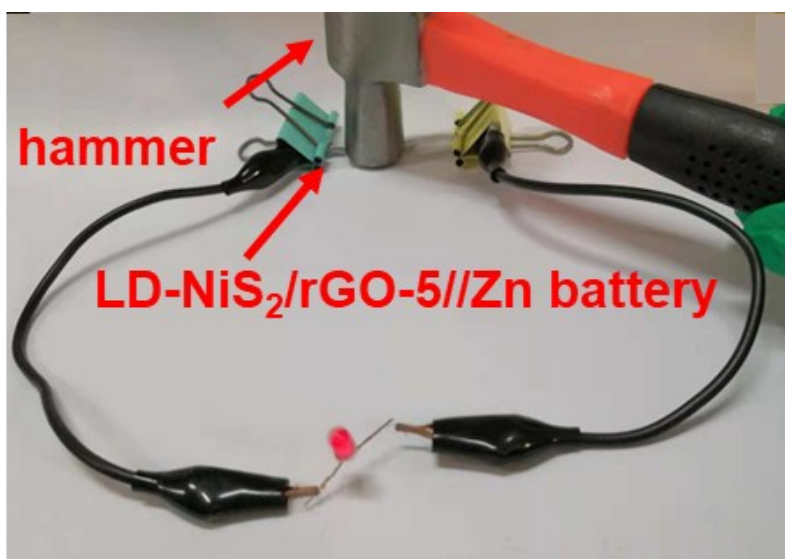

**Figure S10.** Photograph of a hammered LD-NiS<sub>2</sub>/rGO-5//Zn battery showing interrupted power supply.

**Movie S1.** Movie showing a HD-NiS<sub>2</sub>/rGO-5//Zn battery that is constantly being hammered still maintained a stable power output and continued to illuminate a LED.
